# Supplementary material for: Association and Prediction Utilizing Craniocaudal and Mediolateral Oblique View Digital Mammography and Long-Term Breast Cancer Risk
Source: PubMed Central journal article supplement — Cancer Prev Res (Phila). 2023 Jul 7;16(9):531–7. doi: 10.1158/1940-6207.CAPR-22-0499 (PMC10472097; doi:10.1158/1940-6207.capr-22-0499), 2023-07-07

**Supplementary Figure S3.** Linear correlation and scatter plots separated by cases (first row) and controls (second row); all variables are square root transformed. **a.** MLO vs. Full-VPD. **b.** CC vs. Full-VPD. **c.** CC vs. MLO-VPD.

a)

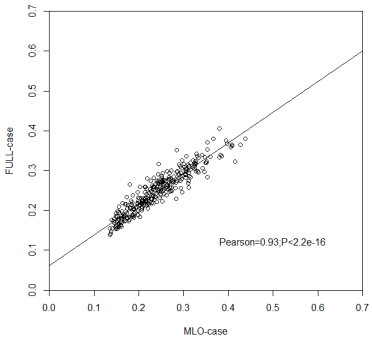

b)

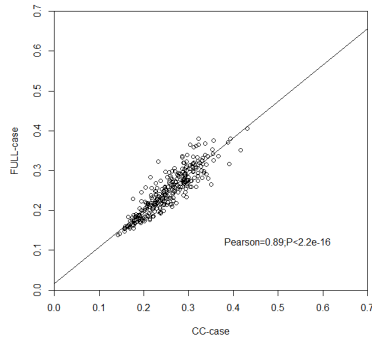

c)

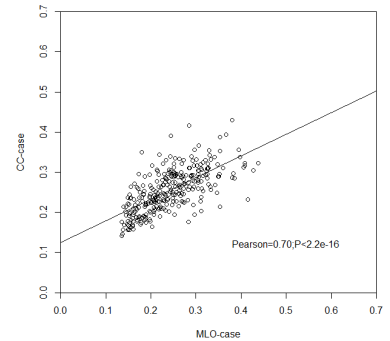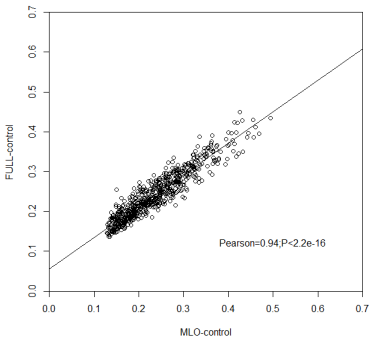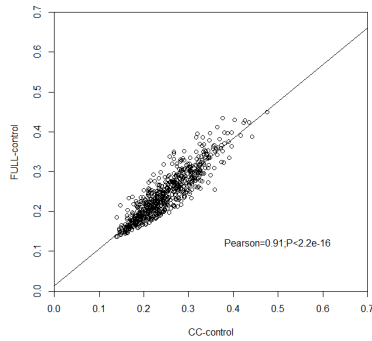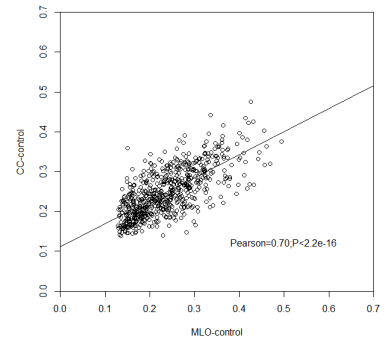

Supplement: capr-22-0499_supplementary_figure_s3_suppsf3.pdf [file capr-22-0499_supplementary_figure_s3_suppsf3.pdf]
