# Supplementary material for: Association and Prediction Utilizing Craniocaudal and Mediolateral Oblique View Digital Mammography and Long-Term Breast Cancer Risk
Source: PubMed Central journal article supplement — Cancer Prev Res (Phila). 2023 Jul 7;16(9):531–7. doi: 10.1158/1940-6207.CAPR-22-0499 (PMC10472097; doi:10.1158/1940-6207.capr-22-0499), 2023-07-07

**Supplementary Figure S5.** The Schoenfeld residuals plot of the baseline risk factors under Cox regression with CC-VPD.

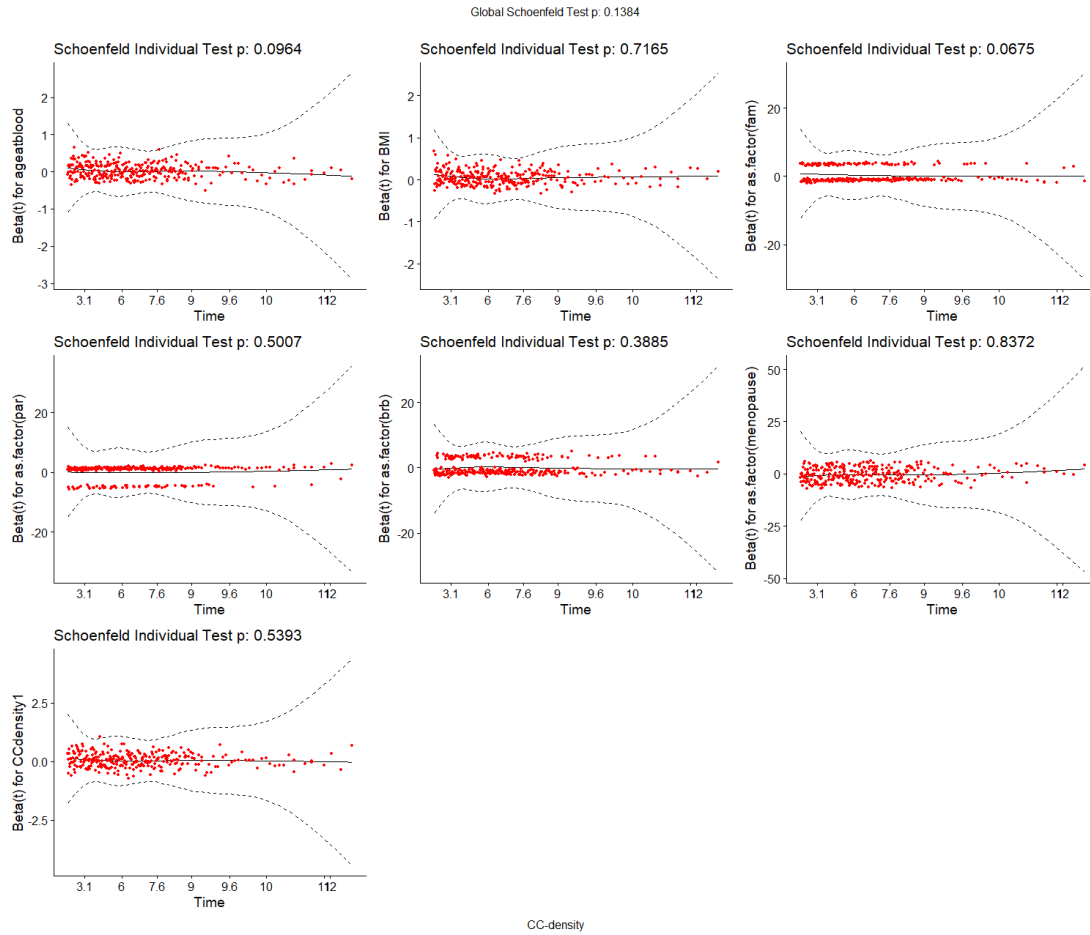

Supplement: capr-22-0499_supplementary_figure_s5_suppsf5.pdf [file capr-22-0499_supplementary_figure_s5_suppsf5.pdf]
