# Supplementary material for: Association and Prediction Utilizing Craniocaudal and Mediolateral Oblique View Digital Mammography and Long-Term Breast Cancer Risk
Source: PubMed Central journal article supplement — Cancer Prev Res (Phila). 2023 Jul 7;16(9):531–7. doi: 10.1158/1940-6207.CAPR-22-0499 (PMC10472097; doi:10.1158/1940-6207.capr-22-0499), 2023-07-07
Supplement: capr-22-0499_supplementary_table_s1_suppst1.pdf [file capr-22-0499_supplementary_table_s1_suppst1.pdf]

**Supplementary Table S1.** Association between baseline risk factors and breast cancer risk utilizing CC-VPD only for post-menopausal women.

| Risk factors                           | Estimates   |                 |             |             |
|----------------------------------------|-------------|-----------------|-------------|-------------|
|                                        | HR          | P-value         | Lower 95%   | Upper 95%   |
| Model                                  |             |                 |             |             |
| Age                                    | 1.03        | 0.029           | 1.00        | 1.06        |
| <b>BMI (kg/m<sup>2</sup>)</b>          | <b>1.05</b> | <b>&lt;0.01</b> | <b>1.03</b> | <b>1.08</b> |
| Family history                         | 1.21        | 0.23            | 0.89        | 1.65        |
| Biopsy confirmed benign breast disease | 0.99        | 0.95            | 0.73        | 1.34        |
| Parity (1+ vs 0)                       | 0.98        | 0.89            | 0.69        | 1.39        |
| CC-VPD (per 1% increase)               | 1.04        | 0.10            | 0.99        | 1.09        |
