# Supplementary material for: Association and Prediction Utilizing Craniocaudal and Mediolateral Oblique View Digital Mammography and Long-Term Breast Cancer Risk
Source: PubMed Central journal article supplement — Cancer Prev Res (Phila). 2023 Jul 7;16(9):531–7. doi: 10.1158/1940-6207.CAPR-22-0499 (PMC10472097; doi:10.1158/1940-6207.capr-22-0499), 2023-07-07
Supplement: capr-22-0499_supplementary_table_s3_suppst3.pdf [file capr-22-0499_supplementary_table_s3_suppst3.pdf]

**Supplementary Table S3.** Association between baseline risk factors and breast cancer risk utilizing FULL-VPD only for post-menopausal women.

| Risk factors                           | Estimates   |                 |             |             |
|----------------------------------------|-------------|-----------------|-------------|-------------|
|                                        | HR          | P-value         | Lower 95%   | Upper 95%   |
| <b>Age</b>                             | <b>1.03</b> | <b>0.03</b>     | <b>1.00</b> | <b>1.06</b> |
| <b>BMI (kg/m<sup>2</sup>)</b>          | <b>1.05</b> | <b>&lt;0.01</b> | <b>1.03</b> | <b>1.07</b> |
| Family history                         | 1.20        | 0.25            | 0.88        | 1.64        |
| Biopsy confirmed benign breast disease | 0.98        | 0.92            | 0.73        | 1.33        |
| Parity (1+ vs 0)                       | 0.99        | 0.94            | 0.69        | 1.40        |
| <b>FULL-VPD (per 1% increase)</b>      | <b>1.06</b> | <b>0.04</b>     | <b>1.00</b> | <b>1.1</b>  |
