# Supplementary material for: Association and Prediction Utilizing Craniocaudal and Mediolateral Oblique View Digital Mammography and Long-Term Breast Cancer Risk
Source: PubMed Central journal article supplement — Cancer Prev Res (Phila). 2023 Jul 7;16(9):531–7. doi: 10.1158/1940-6207.CAPR-22-0499 (PMC10472097; doi:10.1158/1940-6207.capr-22-0499), 2023-07-07
Supplement: capr-22-0499_supplementary_table_s4_suppst4.pdf [file capr-22-0499_supplementary_table_s4_suppst4.pdf]

**Supplementary Table S4.** Association between baseline risk factors and breast cancer risk utilizing CC-VPD only for pre-menopausal women.

| Risk factors                           | Estimates   |                 |             |             |
|----------------------------------------|-------------|-----------------|-------------|-------------|
|                                        | HR          | P-value         | Lower 95%   | Upper 95%   |
| Model                                  |             |                 |             |             |
| Age                                    | 1.00        | 0.89            | 0.95        | 1.06        |
| <b>BMI (kg/m<sup>2</sup>)</b>          | <b>1.06</b> | <b>&lt;0.01</b> | <b>1.03</b> | <b>1.10</b> |
| <b>Family history</b>                  | <b>1.91</b> | <b>&lt;0.01</b> | <b>1.24</b> | <b>2.94</b> |
| Biopsy confirmed benign breast disease | 1.15        | 0.61            | 0.68        | 1.94        |
| Parity (1+ vs 0)                       | 0.87        | 0.56            | 0.54        | 1.41        |
| <b>CC-VPD (per 1% increase)</b>        | <b>1.07</b> | <b>0.04</b>     | <b>1.00</b> | <b>1.14</b> |
