# Supplementary figures and images for: Association and Prediction Utilizing Craniocaudal and Mediolateral Oblique View Digital Mammography and Long-Term Breast Cancer Risk
Source: PubMed Central journal article supplement — Cancer Prev Res (Phila). 2023 Jul 7;16(9):531–7. doi: 10.1158/1940-6207.CAPR-22-0499 (PMC10472097; doi:10.1158/1940-6207.capr-22-0499), 2023-07-07

**Supplementary Figure S1. Classification flow chart of cases and controls**

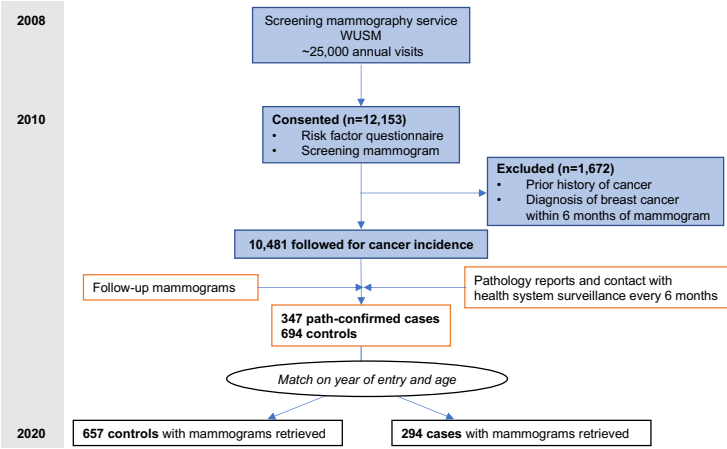

Supplement: capr-22-0499_supplementary_figure_s1_suppsf1.pdf [file capr-22-0499_supplementary_figure_s1_suppsf1.pdf]

**Supplementary Figure S4.** The Martingale residuals plot for modeling with CC-VPD, MLO-VPD, FULL-VPD.

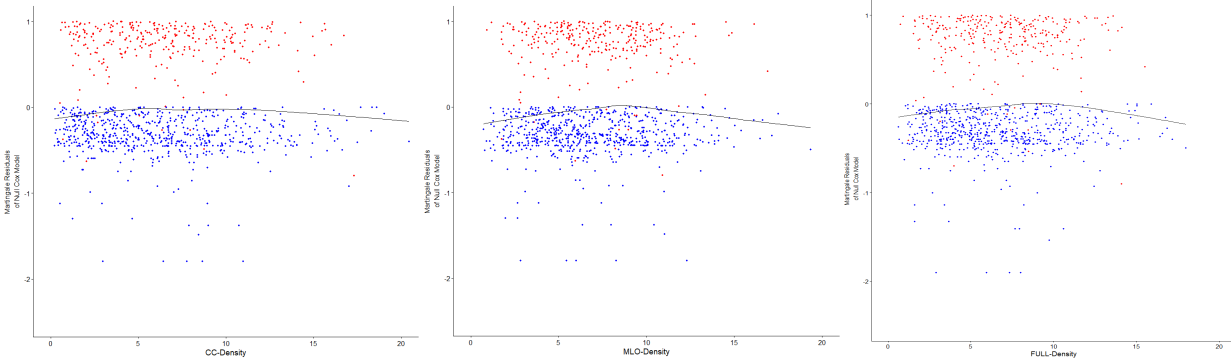

Supplement: capr-22-0499_supplementary_figure_s4_suppsf4.pdf [file capr-22-0499_supplementary_figure_s4_suppsf4.pdf]
